# Supplementary material for: Probing specific RNA bulge conformations by modified fluorescent nucleosides
Source: Royal Society of Chemistry journal article supplement (doi:10.1039/b816768k), 2009-01-01

## Electronic Supplementary Information (ESI)

### Probing Specific RNA Bulge Conformations by Modified Fluorescent Nucleosides

Hyun Seok Jeong<sup>a,b</sup>, Sunwoo Kang<sup>c</sup>, Jin Yong Lee<sup>c,\*</sup> and Byeang Hyeon Kim<sup>a,\*</sup>

<sup>a</sup>*Department of Chemistry, BK School of Molecular Science, <sup>b</sup>School of Interdisciplinary Bioscience and Bioengineering (I-BIO), Pohang University of Science and Technology, Pohang 790-784, Korea*

<sup>c</sup>*Department of Chemistry, Institute of Basic Science, Sungkyunkwan University, Suwon 440-746, Korea*

- S2 Fig S1. The initial structure of U<sup>PY</sup>23-RNA, U25<sup>PY</sup>-RNA, U<sup>PY</sup>23-RNA-ARG, and U<sup>PY</sup>25-RNA-ARG
- S2-S3 Fig S2. The examples of the optimized structures of U<sup>PY</sup>25-RNA-ARG for various initial structures
- Table S1. Relative energies for the optimized U<sup>PY</sup>25-RNA-ARG complexes for various initial structures.
- S4-S5 <sup>1</sup>H NMR spectrums for synthesized compounds 2-5
- S6 Table S2. MALDI-TOF mass spectral data for the ODNs.
- S7-S8 MALDI-TOF spectrums for the ODNs

Fig S1. The initial structure of (a) U23<sup>PY</sup>-RNA, (b) U<sup>PY</sup>23-RNA-ARG, (c) U25<sup>PY</sup>-RNA, and (d) U<sup>PY</sup>25-RNA-ARG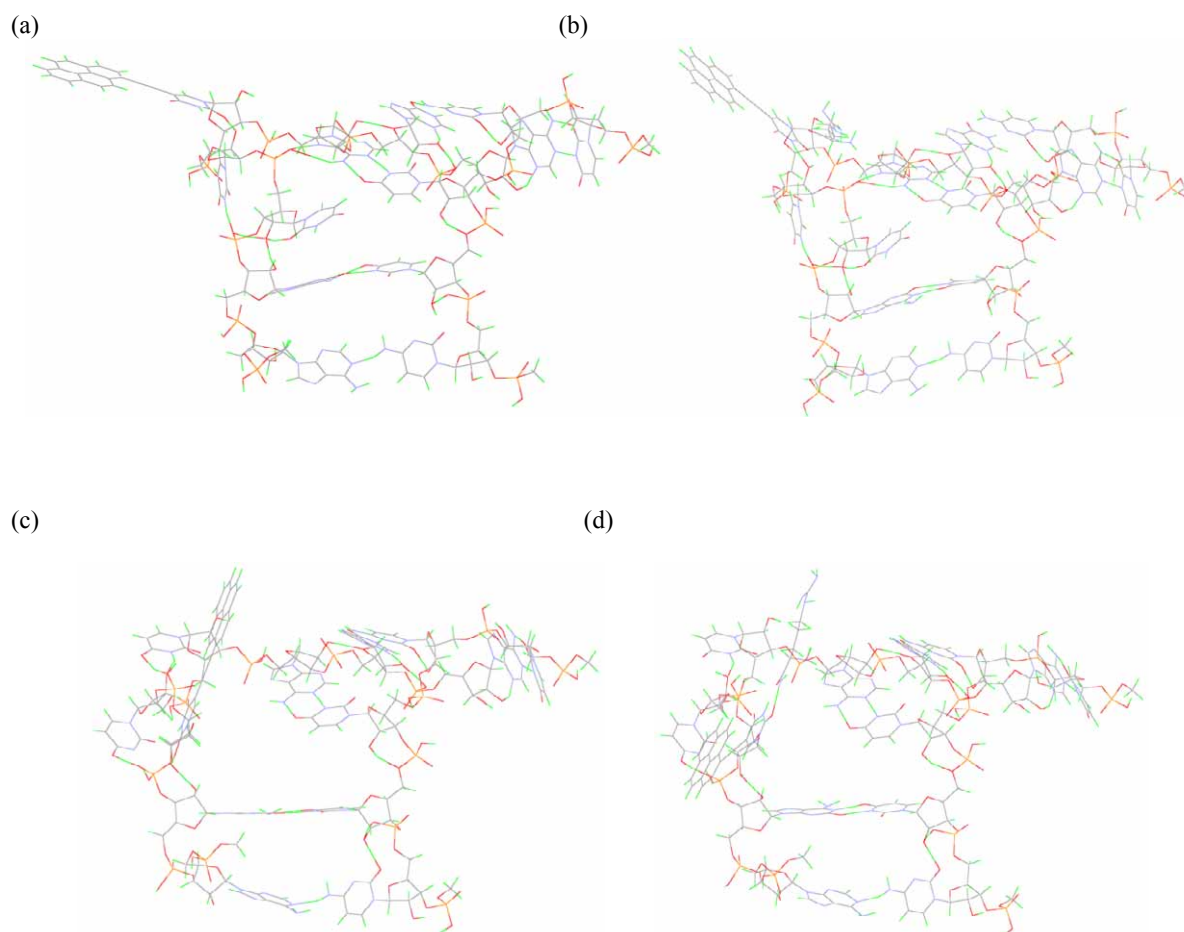

Fig S2. The optimized structures of U<sup>PY</sup>25-RNA-ARG complexes for various initial structures (a-d). The structures in the left/right column are the initial/optimized structures. In particular for the geometry optimization of U<sup>PY</sup>25-RNA-ARG, we used four different initial structures. The four initial structures were generated by rotating the pyrene moiety in different directions. Among them, U<sup>PY</sup>25-RNA-ARG (d) is the lowest energy conformer, and is denoted as U<sup>PY</sup>25-RNA-ARG in this manuscript. For U<sup>PY</sup>25-RNA-ARG (d), the initial structure shows the H-bonding between U<sup>PY</sup>25 and ARG. After the optimization, the U<sup>PY</sup>25 and ARG were rotated due to the enhanced interactions between the terminal amino group of ARG and RNA groove as shown.

(a)

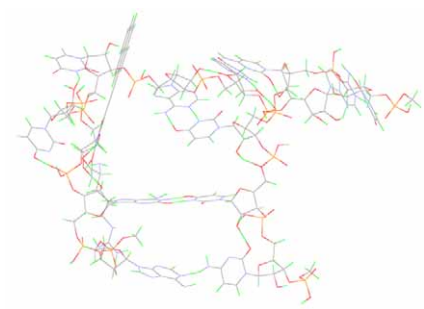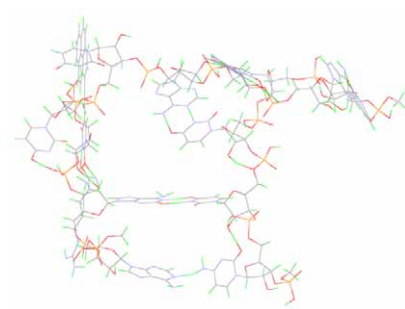

(b)

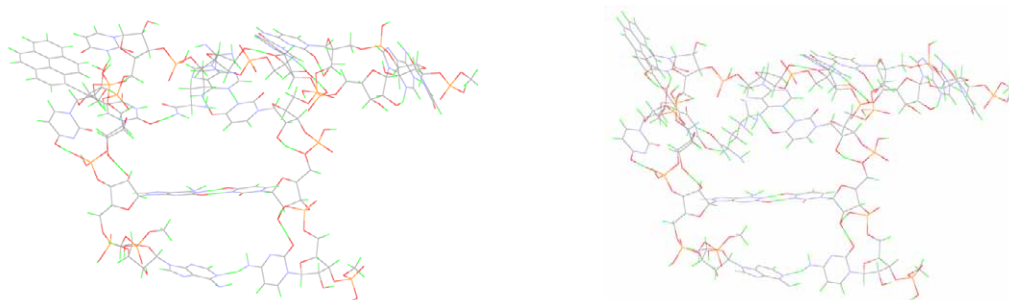

(c)

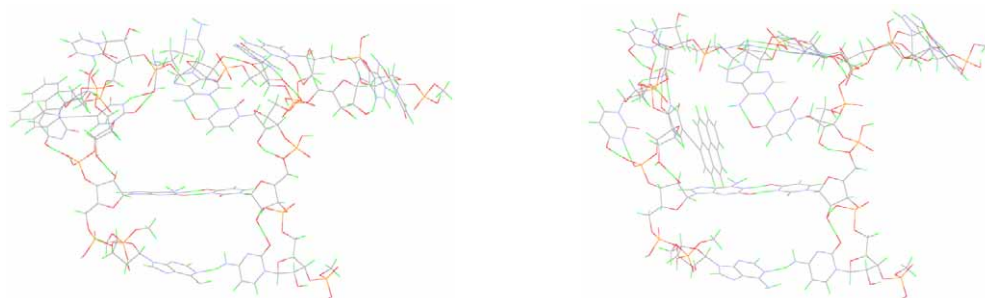

(d)

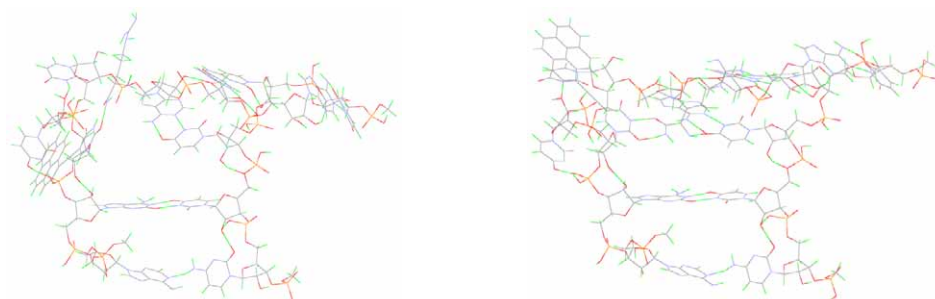Table S1. Relative energies for the optimized U<sup>PY</sup>25-RNA-ARG complexes for various initial structures (a-d).

| Conformations                  | Relative energy (kcal/mol) |
|--------------------------------|----------------------------|
| U <sup>PY</sup> 25-RNA-ARG (a) | 18.51                      |
| U <sup>PY</sup> 25-RNA-ARG (b) | 20.86                      |
| U <sup>PY</sup> 25-RNA-ARG (c) | 17.84                      |
| U <sup>PY</sup> 25-RNA-ARG (d) | 0                          |

**5'-O-[bis(4-methoxyphenyl)phenylmethyl]-5-iodouridine (2)**

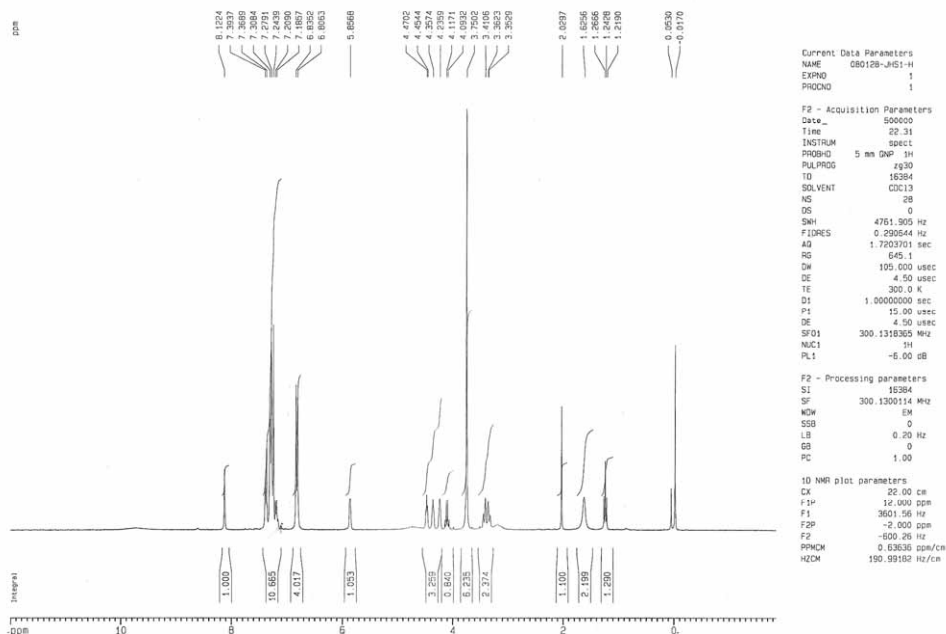

**5'-O-[bis(4-methoxyphenyl)phenylmethyl]-2'-O-(tert-butyl-dimethylsilyl)-(-)-5-iodouridine (3)**

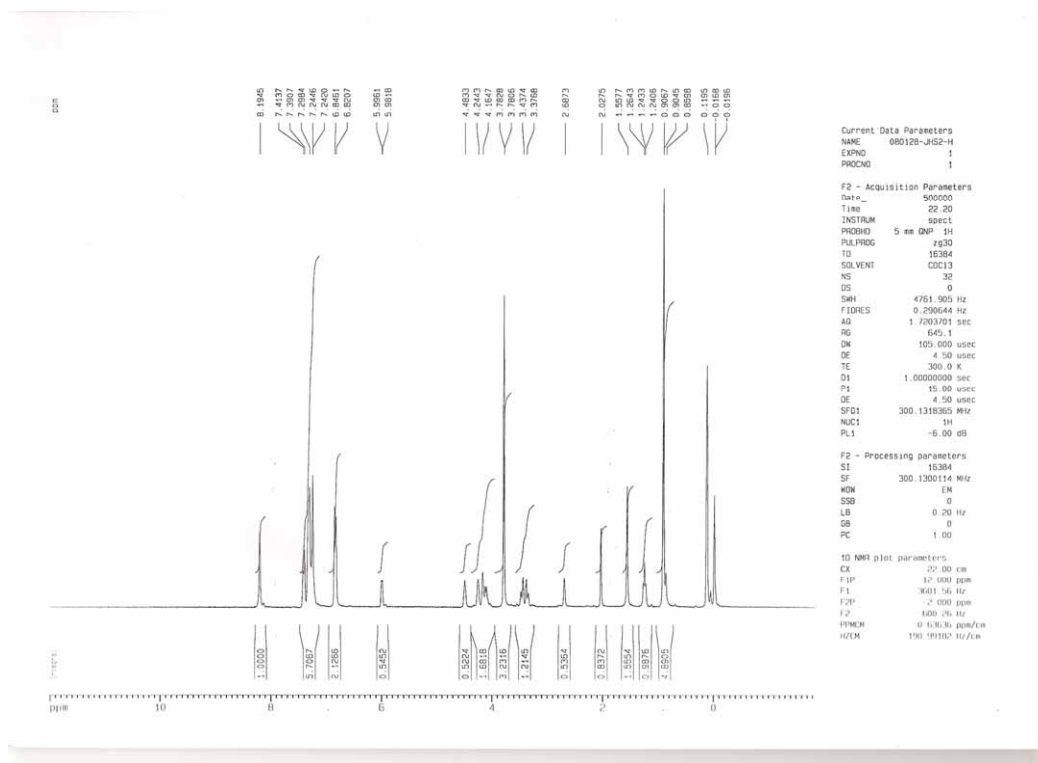

5'-O-[bis(4-methoxyphenyl)phenylmethyl]-2'-O-(tert-butyl-dimethylsilyl)-5-(2-ethynylpyrenyl)uridine (4)

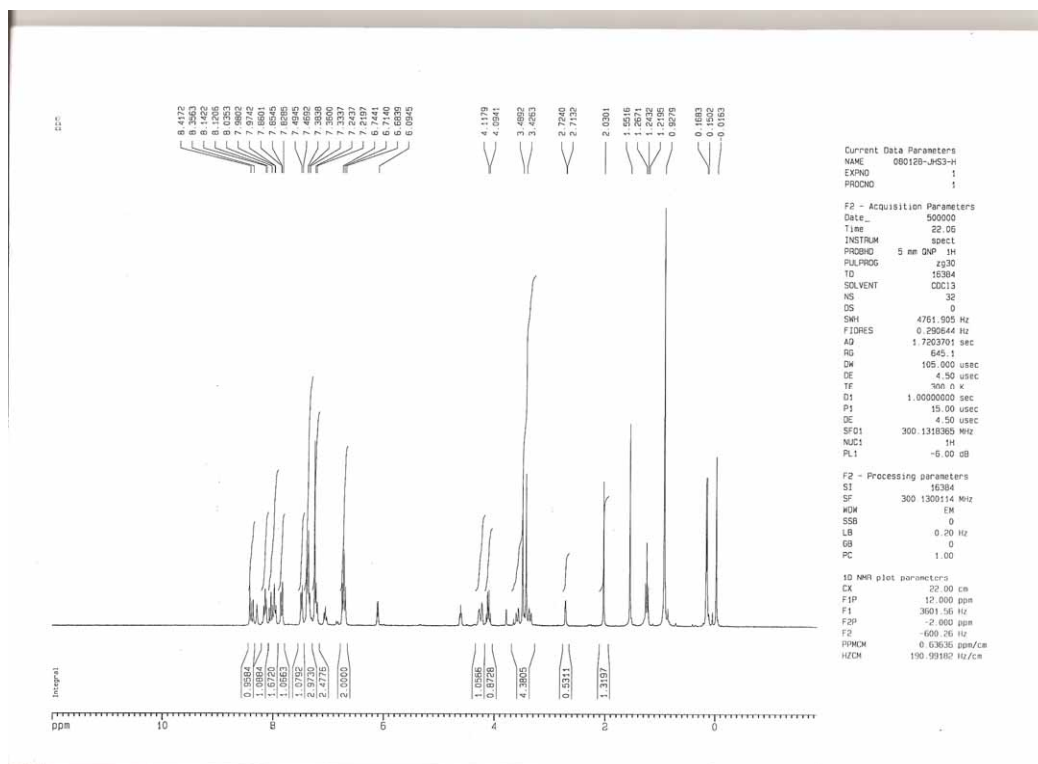

**5'-O-[bis(4-methoxyphenyl)phenylmethyl]-2'-O-(tert-butyl-dimethylsilyl)-5-(2-ethynylpyrenyl)uridine 3'-O-[2-cyanoethyl(N,N-diisopropylamino)phosphoramidite] (5)**

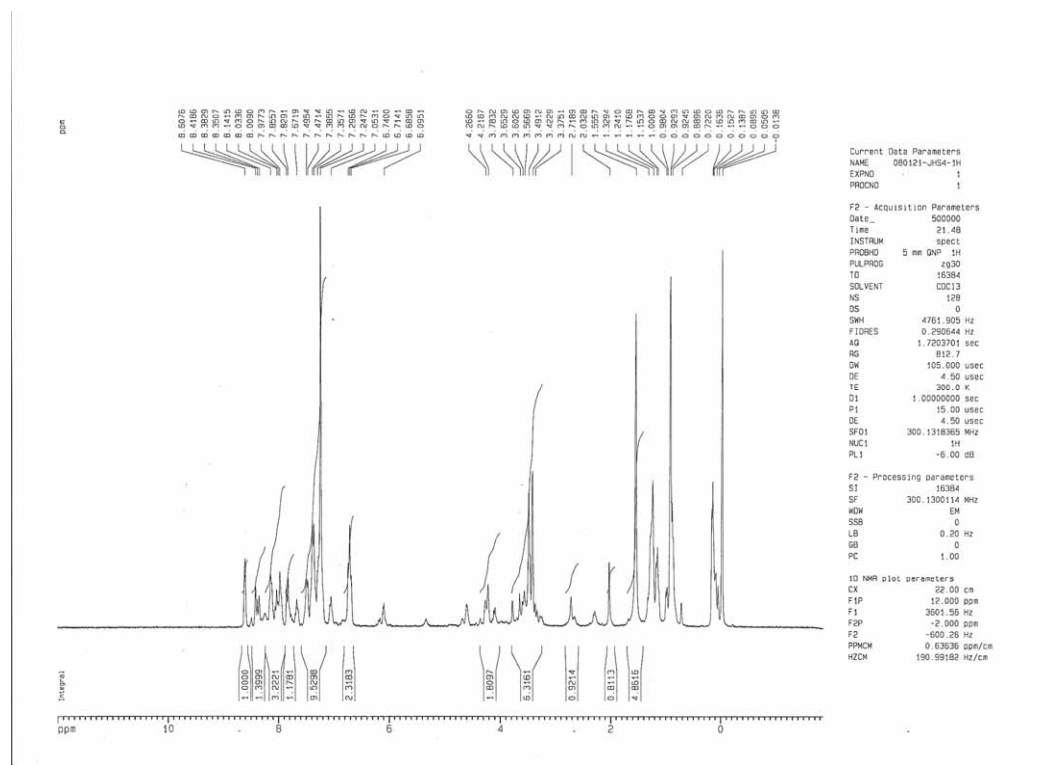

**Table S1. MALDI-TOF Mass Spectral Data for the ODNs [M+]**

| Sequences   | Calculated m/z | Found m/z |
|-------------|----------------|-----------|
| 6 (Control) | 10891          | 10889     |
| 7 (U23)     | 11113          | 11108     |
| 8 (U25)     | 11113          | 11117     |
| 9 (U31)     | 11113          | 11115     |

MALDI-TOF data for 6 (Control) RNA

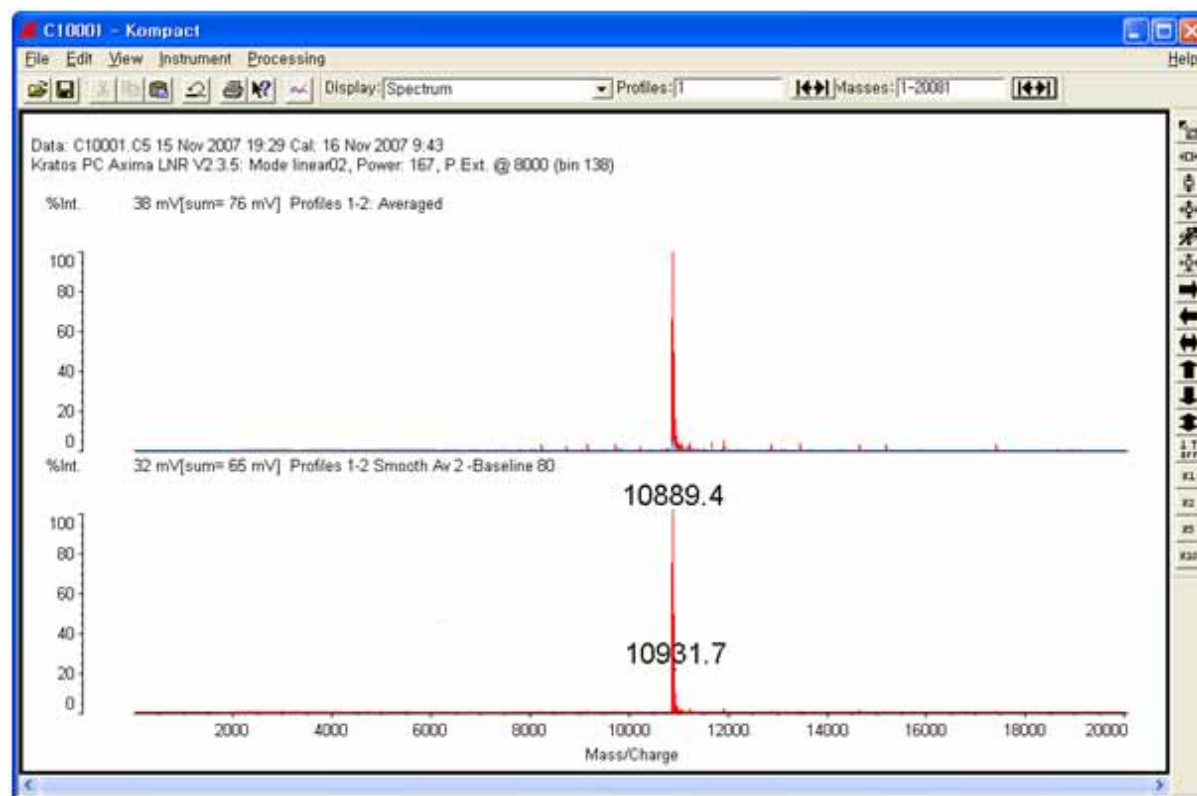

MALDI-TOF data for 7 (U23)



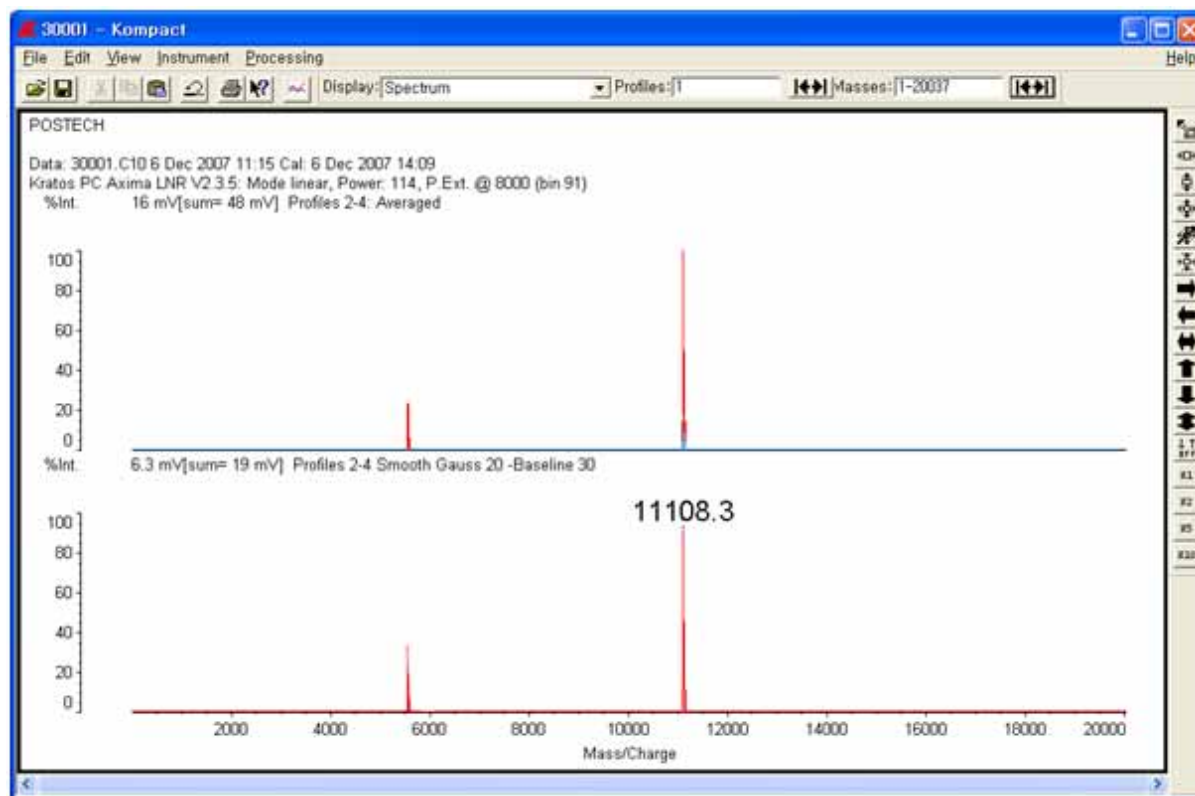

MALDI-TOF data for 7 (U25)

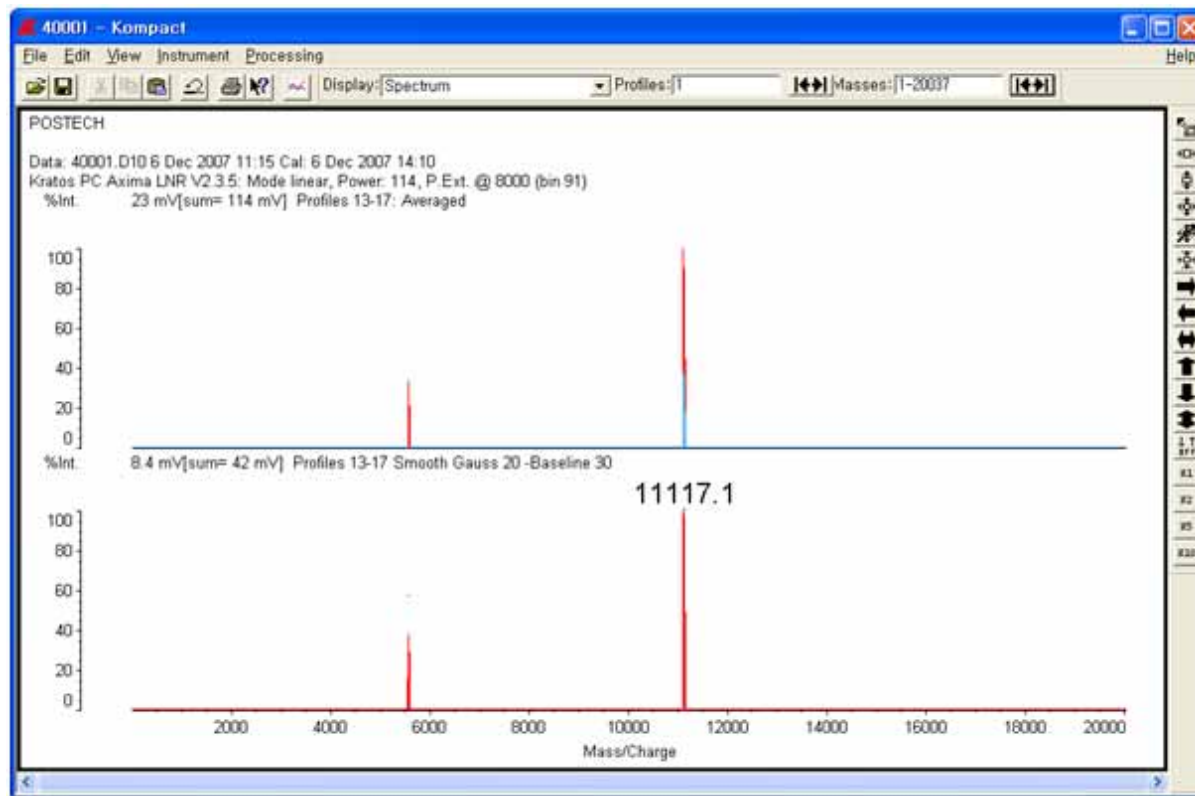

MALDI-TOF data for 7 (U31)

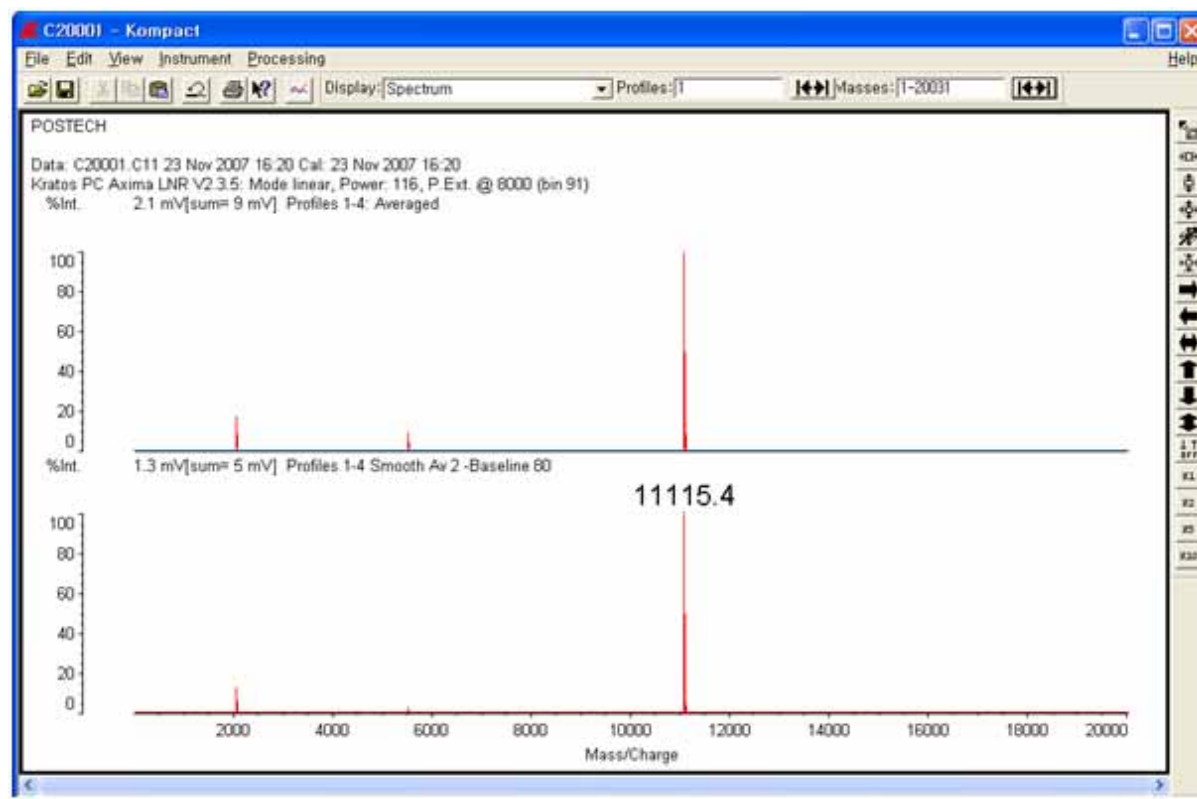

Supplement: b816768k.pdf [file b816768k.pdf]
